# Supplementary material for: pH-Controlled fluorescence switching in water-dispersed polymer brushes grafted to modified boron nitride nanotubes for cellular imaging
Source: publisher site journal article supplement (doi:10.3762/bjnano.10.233), 2019-12-10
Supplement: Additional file 1 [file 2190-4286-10-233-S1.pdf]

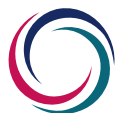

## Supporting Information

for

### **pH-Controlled fluorescence switching in water-dispersed polymer brushes grafted to modified boron nitride nanotubes for cellular imaging**

Saban Kalay, Yuriy Stetsyshyn, Volodymyr Donchak, Khrystyna Harhay, Ostap Lishchynskyi, Halyna Ohar, Yuriy Panchenko, Stanislav Voronov and Mustafa Çulha

*Beilstein J. Nanotechnol.* **2019**, *10*, 2428–2439. doi:10.3762/bjnano.10.233

### **Fluorescence scanning (typical excitation and emission spectra) of P(AA-co-FM)-functionalized BNNTs under different pH conditions**

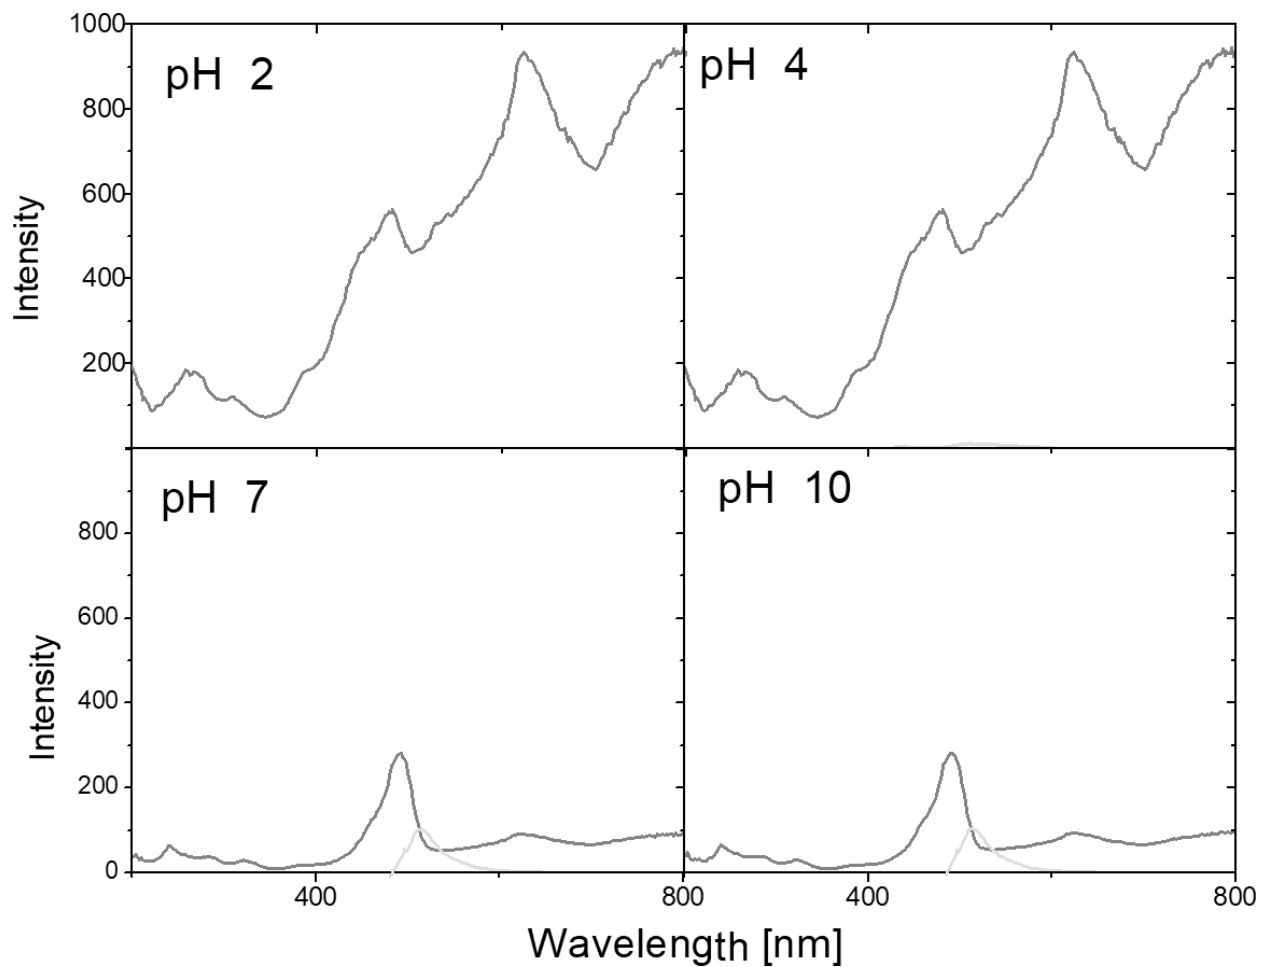

**Figure S1:** Fluorescence scanning (typical excitation and emission spectra) of P(AA-co-FM)-functionalized BNNTs for different pH values. The fluorescence intensity was measured in deionized water and the pH adjusted by adding HCl or NaOH. The P(AA-co-FA)-functionalized BNNT concentration in the solution was (1 mg/mL).
